# Supplementary material
Source: publisher figshare collection journal article supplement (https://tandf.figshare.com/articles/dataset/_/11923170)

Supplementary FIGURE 3: Phylogenetic relationships among representative specimens of *Clitopilus*, *Clitocella* and *Clitopilopsis* inferred from *tef1* dataset using the Maximum Likelihood. The bootstrap frequencies (> 50 %) is shown on the supported branches. New species and new section are highlighted in red.

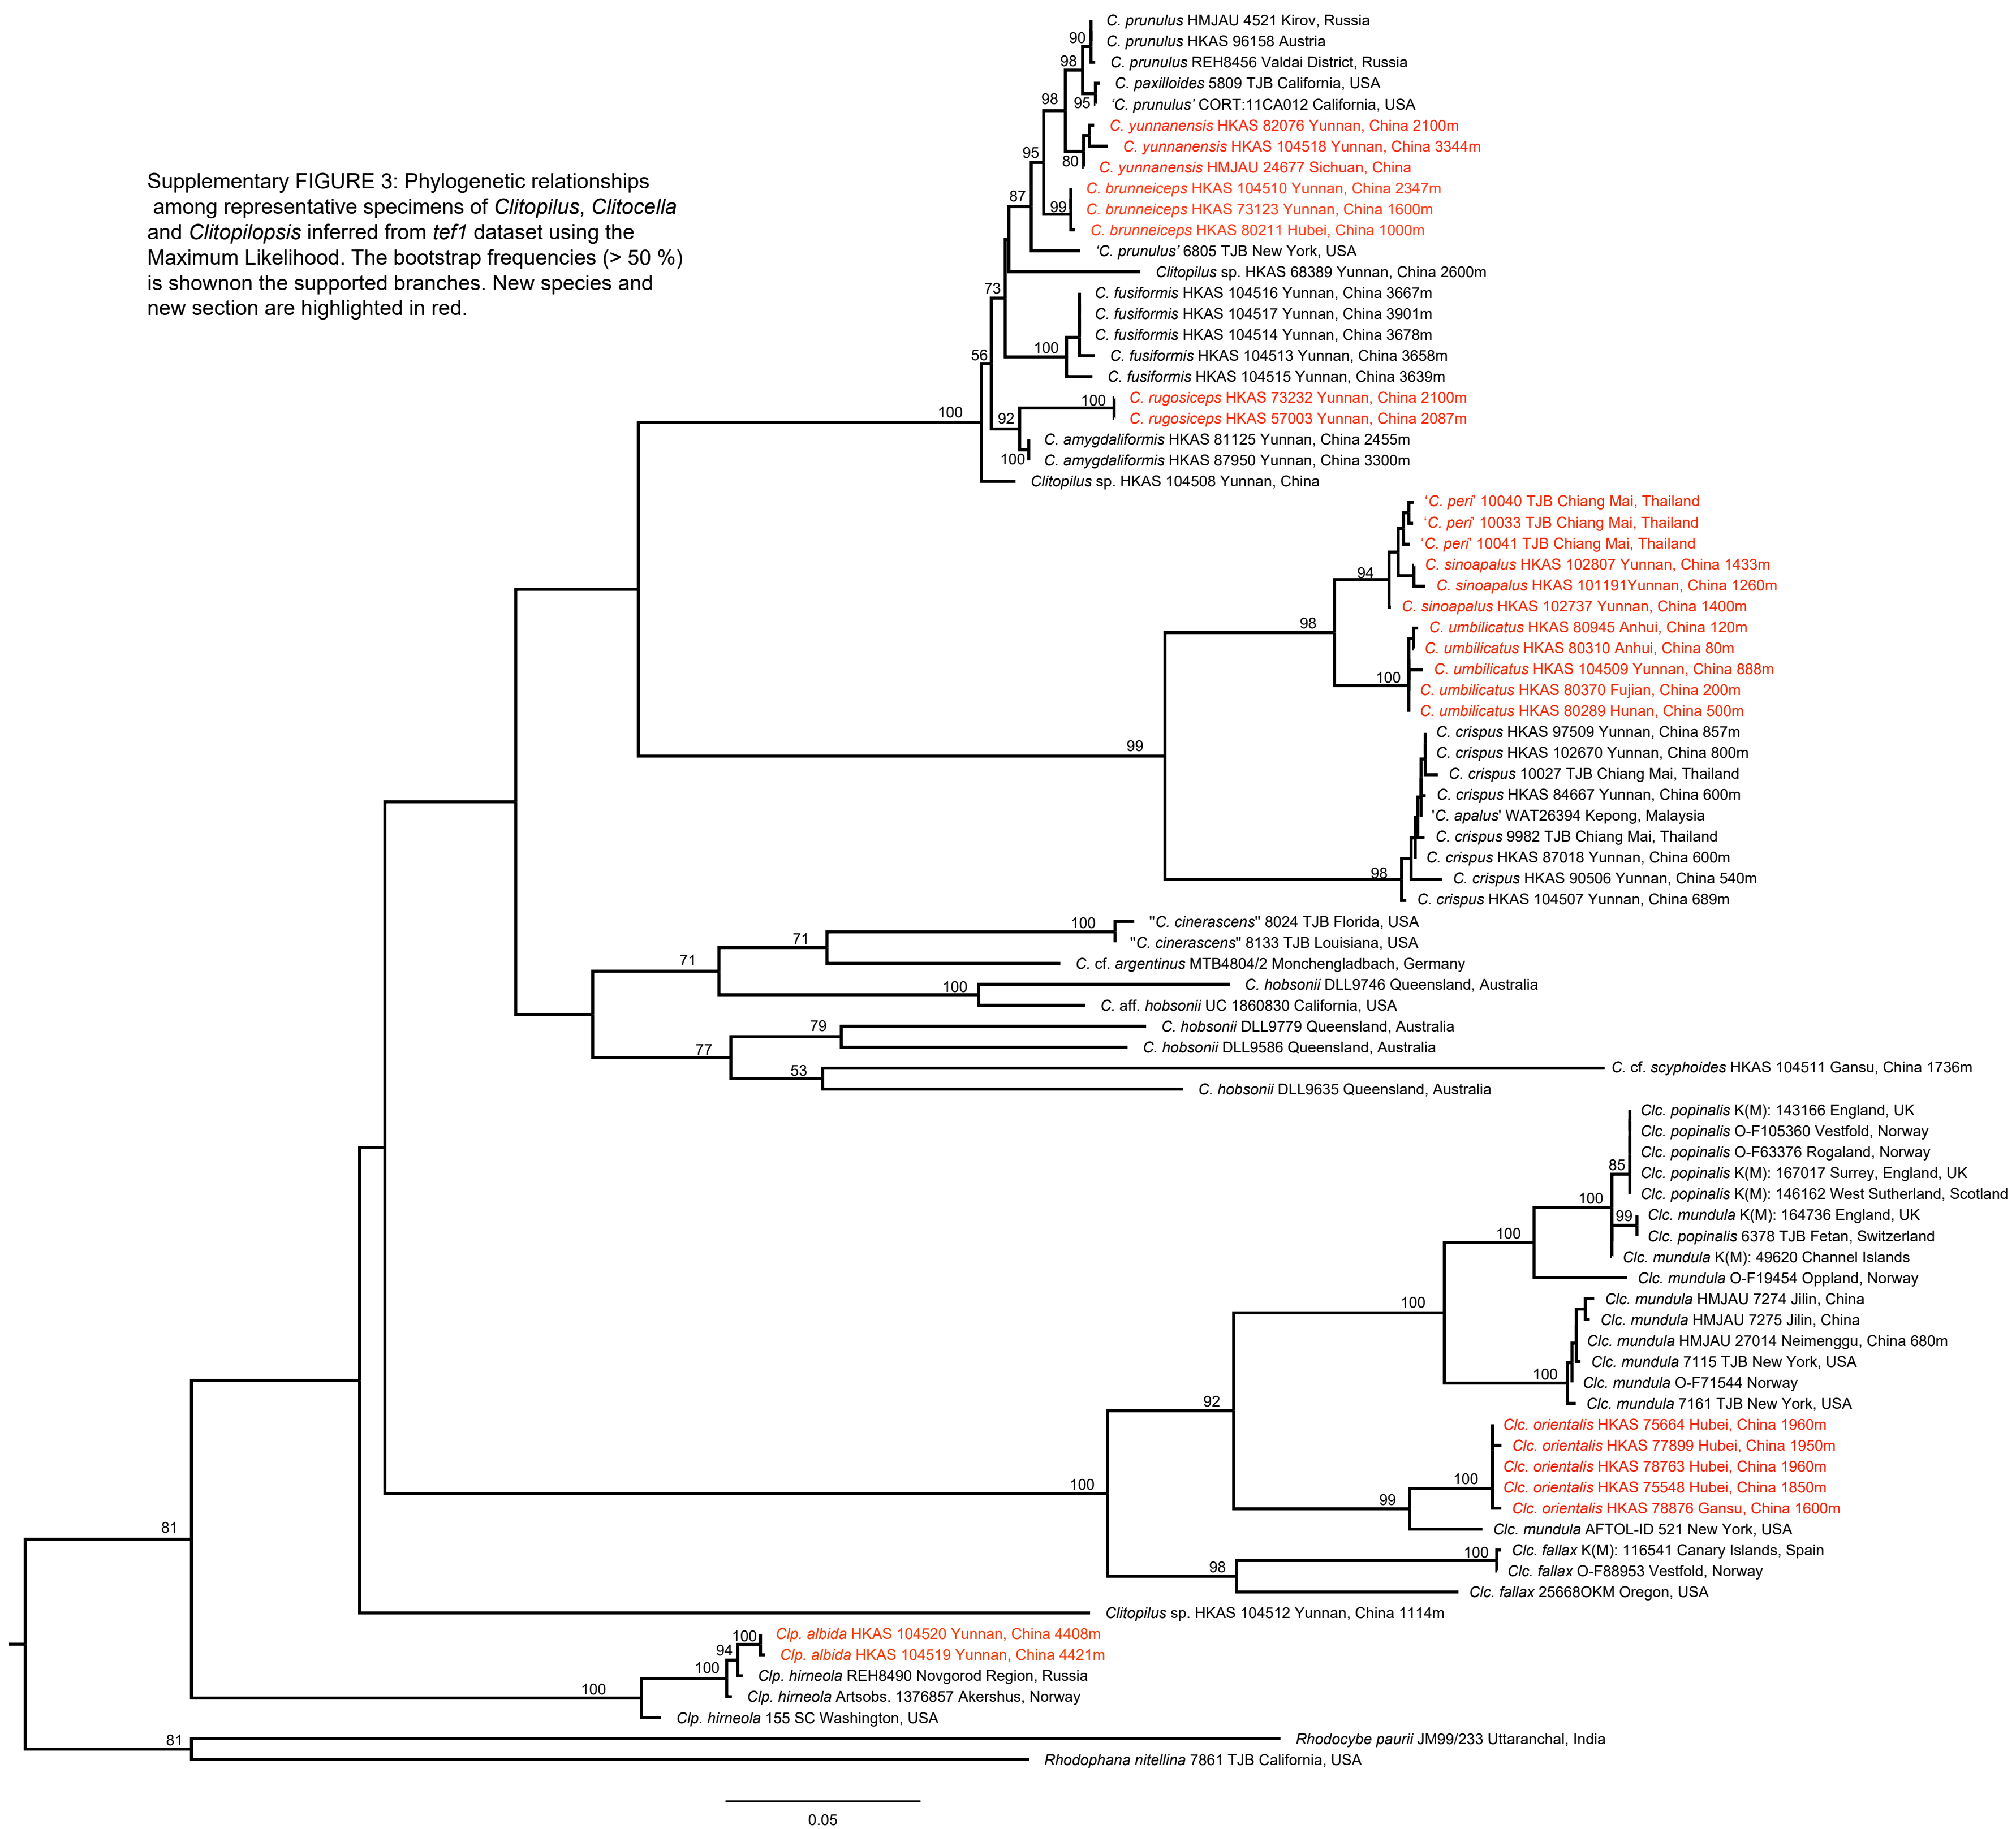

Supplement: Supplementary file 1 [file 1]
