# Supplementary material
Source: publisher figshare collection journal article supplement (https://tandf.figshare.com/articles/dataset/_/11923170)
Supplement: Supplementary file 2 [file 1]

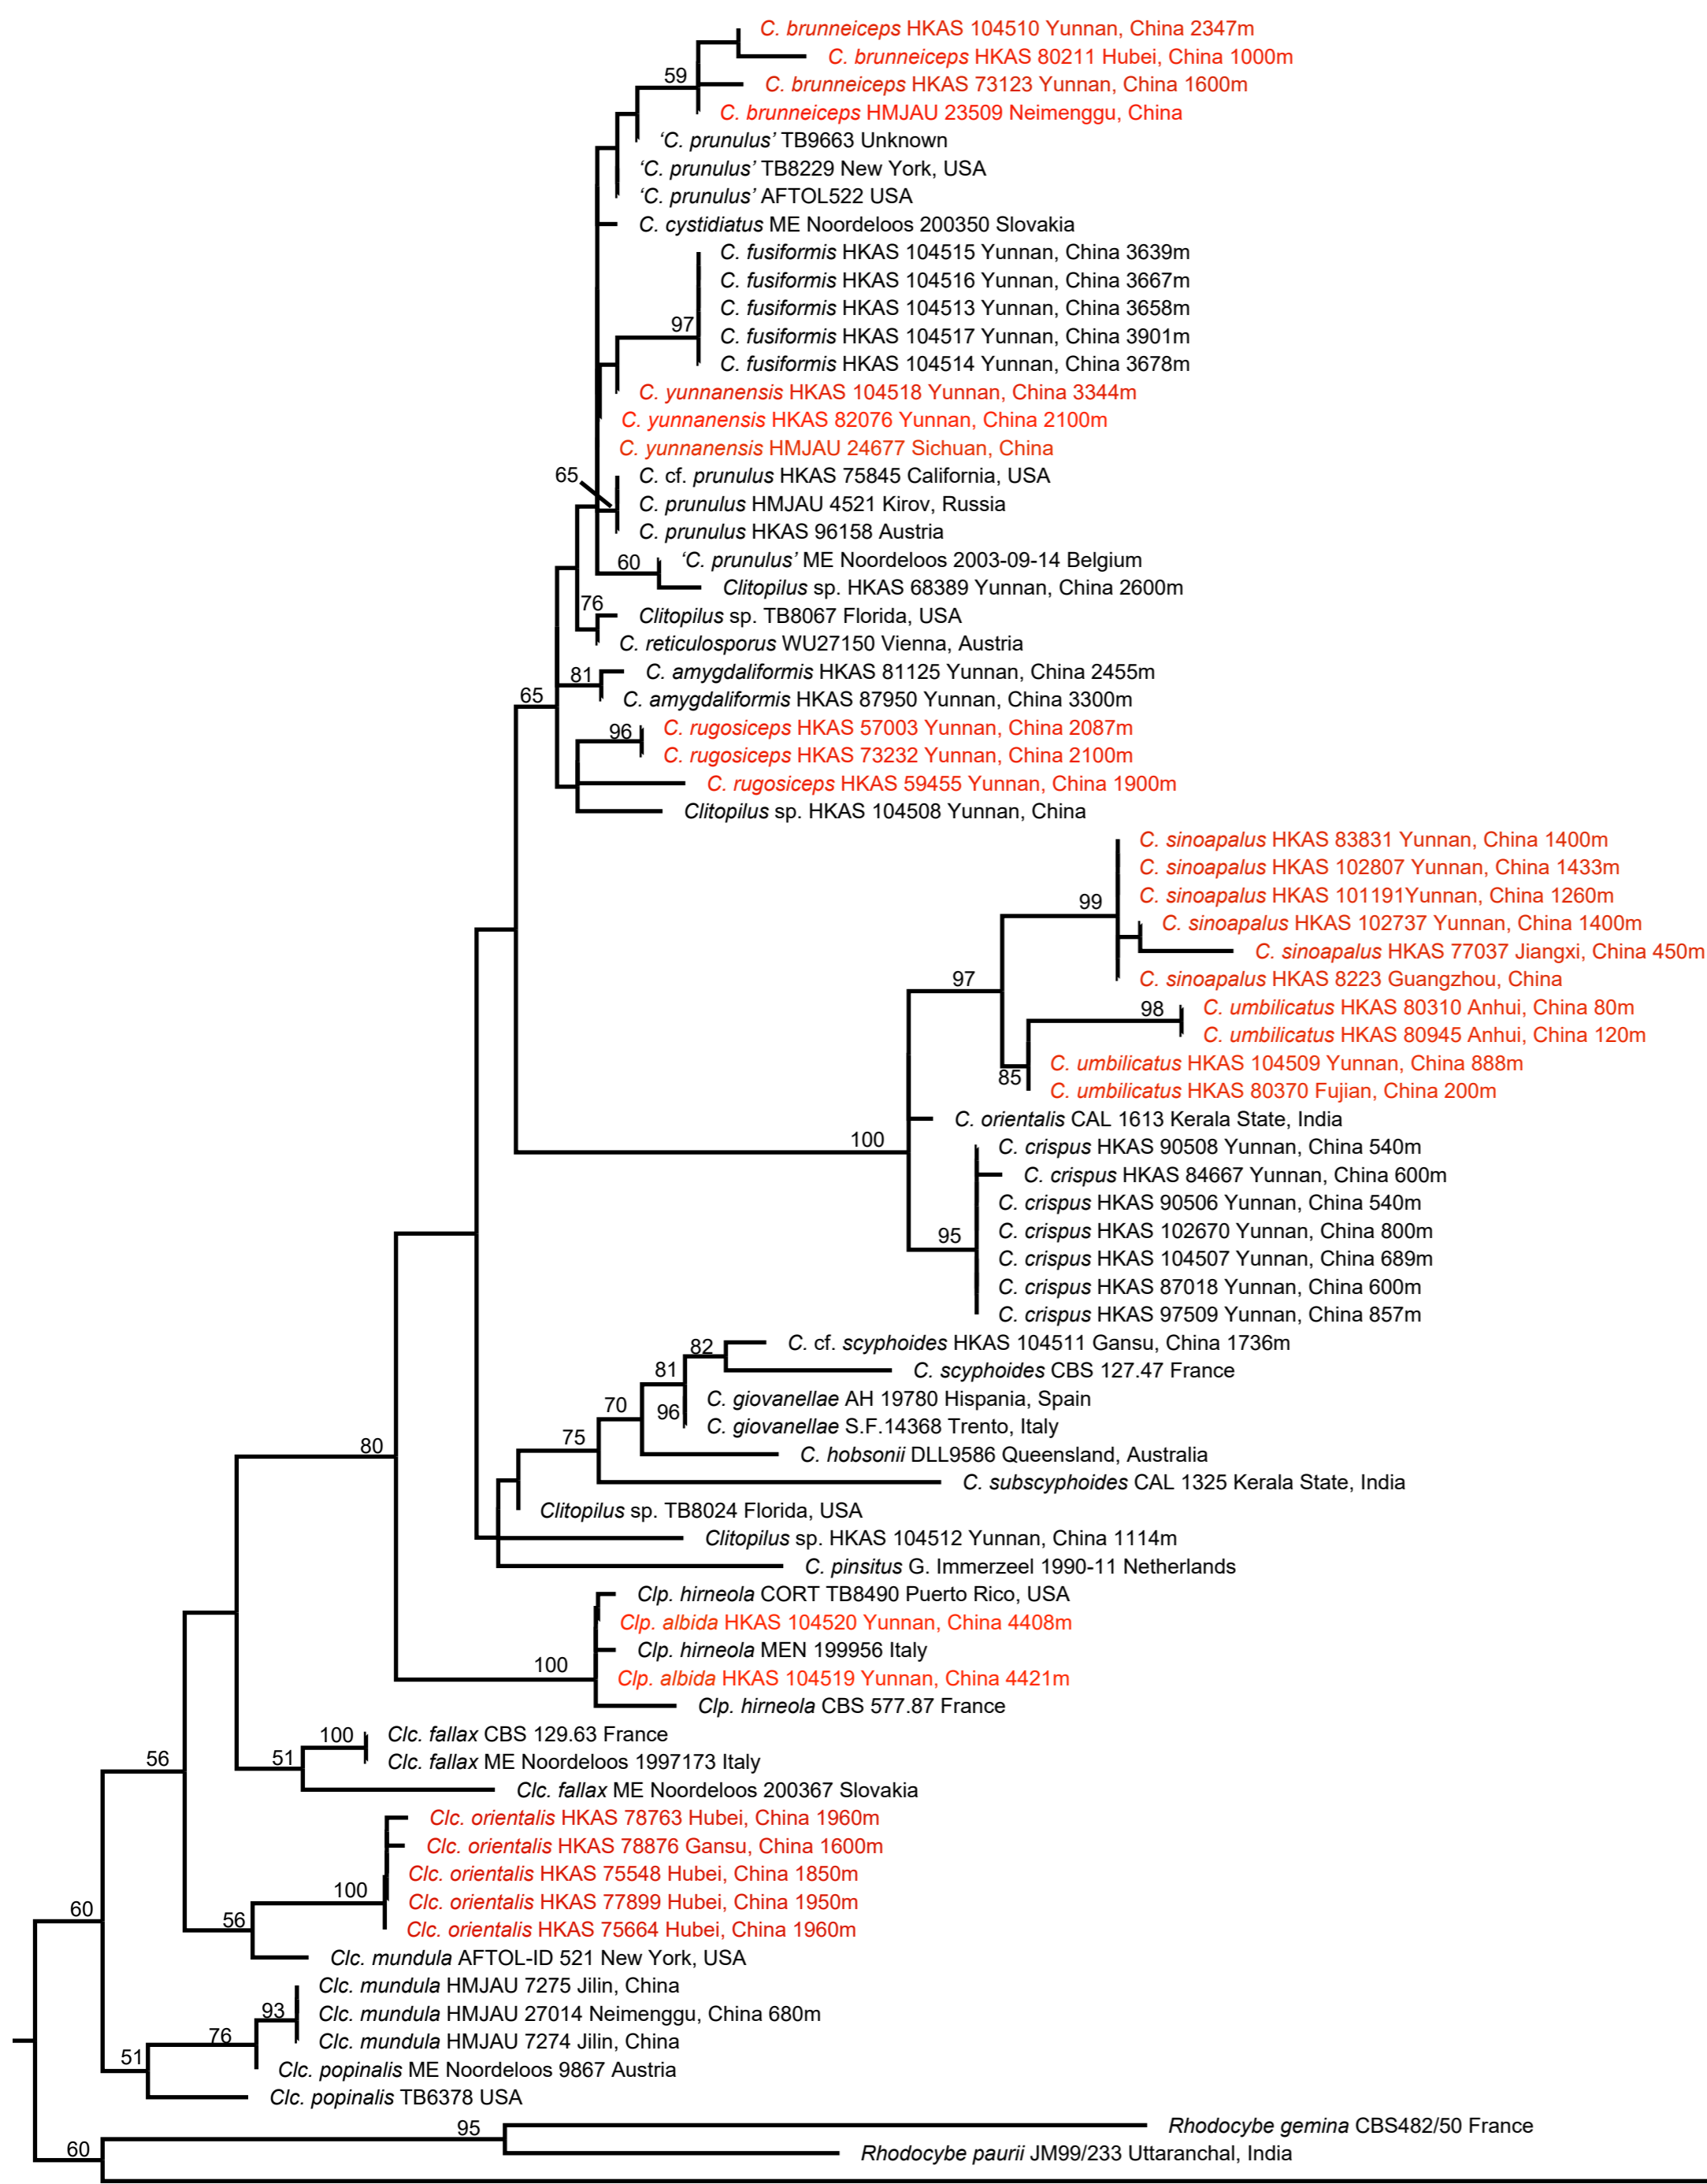

Supplementary FIGURE 1: Phylogenetic relationships among representative specimens of *Clitopilus*, *Clitocella* and *Clitopilopsis* inferred from 28S dataset using the Maximum Likelihood. The bootstrap frequencies (> 50 %) is shown on the supported branches. New species are highlighted in red.

*Rhodophana squamulosa*  
CAL 1262 Kerala State, India
